# Supplementary material for: Lactic Acid Bacteria Exert a Hepatoprotective Effect against Ethanol-Induced Liver Injury in HepG2 Cells
Source: MDPI journal article supplement (doi:10.3390/microorganisms9091844), 2021-08-31
Supplement: s1 [file s1]

**Table S1.** Primers sequence used for qRT-PCR

| Gene <sup>1</sup> |   | Primer sequence (5'→3')     | Accession ID   |
|-------------------|---|-----------------------------|----------------|
| <i>CYP2E1</i>     | F | CGTGGAATGGAGAAGGAAA         | NM_000773.4    |
|                   | R | GGTGATGAACCGCTGAATCT        |                |
| <i>CAT</i>        | F | GAAGTGTCCCTACCGTGCTCGA      | NM_001752.4    |
|                   | R | CCAGAATATTGGATGCTGTGCTCCAGG |                |
| <i>SOD</i>        | F | AATGGACCAGTGAAGGTGTGGGG     | NM_000454.5    |
|                   | R | CACATTGCCCAAGTCTCCAACATGC   |                |
| <i>GPX</i>        | F | CGGCCCAGTCGGTGTATGC         | NM_001329503.2 |
|                   | R | CGTGGTGCCTCAGAGGGAC         |                |
| <i>SREBP1c</i>    | F | CGGAGCCATGGATTGCACT         | NM_001005291.3 |
|                   | R | TAGGCCAGGGAAGTCACTG         |                |
| <i>FAS</i>        | F | TCGTGGGCTACAGCATGGT         | NM_004104.5    |
|                   | R | GCCCTCTGAAGTCGAAGAAGAA      |                |
| <i>PPARα</i>      | F | CAAACCTGGACCTGAACGAT        | NM_001362873.2 |
|                   | R | GAACGGTTTCCTTAGGCTTT        |                |
| <i>CPT1</i>       | F | TTTCCTTGCTGAGGTGCTCT        | NM_004377.4    |
|                   | R | TCTCGCCTGCAATCATGTAG        |                |
| <i>ACO</i>        | F | TCTGTTGACCTTGTTGAGCAA       | NM_001185039.2 |
|                   | R | CAAGCACAGAGCCAAGTGTCAC      |                |
| <i>GAPDH</i>      | F | ACCCACTCCTCCACCTTTG         | NM_001357943.2 |
|                   | R | CTCTTGCTCTTGCTGGG           |                |

<sup>1</sup> *CYP2E1*, Cytochrome P450 2E1; *CAT*, catalase; *SOD*, superoxide dismutase; *GPX*, glutathione peroxidase; *SREBP1c*, sterol regulatory element-binding protein 1; *FAS*, fatty acid synthase; *PPARα*, peroxisome proliferator-activated receptor alpha; *CPT1*, carnitine palmitoyltransferase 1; *ACO*, acyl-CoA 1; *GAPDH*, glyceraldehyde 3-phosphate dehydrogenase.

**Table S2.** The minimum inhibitory concentrations (MIC) cut-off value from EFSA.

| Antimicrobials  | Microbiological cut-off values ( $\mu\text{g/mL}$ ) |                     |                   |
|-----------------|-----------------------------------------------------|---------------------|-------------------|
|                 | <i>L. brevis</i>                                    | <i>L. fermentum</i> | <i>L. reuteri</i> |
| Ampicillin      | 2                                                   | 2                   | 2                 |
| Gentamicin      | 16                                                  | 16                  | 8                 |
| Kanamycin       | 64                                                  | 64                  | 64                |
| Streptomycin    | 64                                                  | 64                  | 64                |
| Tetracycline    | 8                                                   | 8                   | 32                |
| Chloramphenicol | 4                                                   | 4                   | 4                 |
| Erythromycin    | 1                                                   | 1                   | 1                 |
| Vancomycin      | n.r. <sup>1</sup>                                   | n.r.                | n.r.              |
| Clindamycin     | 4                                                   | 4                   | 4                 |

<sup>1</sup> n.r., not required.

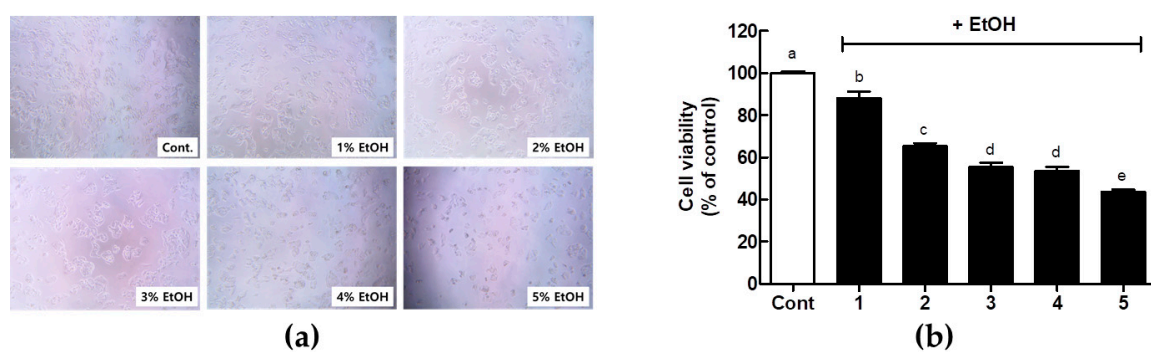

**Figure S1.** The viability of ethanol (EtOH) on HepG2 cells. The cells were treated with various concentrations of EtOH 1 (1 - 5%) for 24 h. The data was expressed as the mean  $\pm$  SD ( $n = 3$ ). Different letters on the column meant significant at  $p < 0.05$  based on Duncan's test.

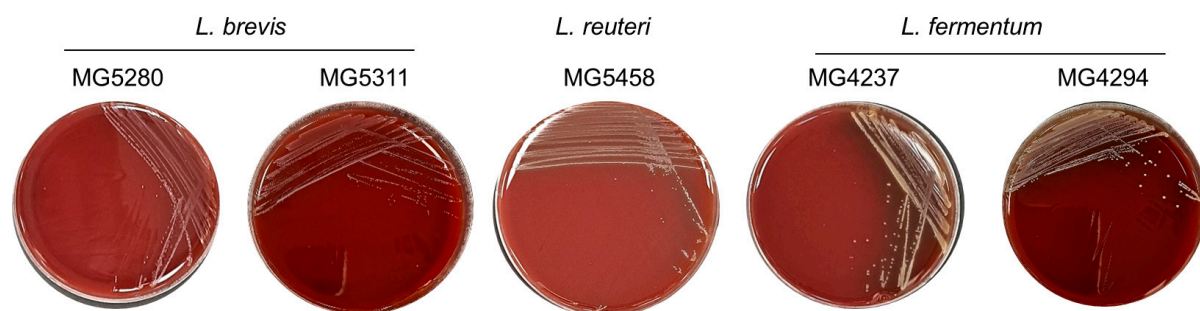

**Figure S2.** The hemolytic activity of LAB strains.
